# Supplementary material for: Responses to an acellular pertussis booster vaccination in children, adolescents, and young and older adults: A collaborative study in Finland, the Netherlands, and the United Kingdom
Source: PubMed Central journal article supplement — eBioMedicine. 2021 Feb 26;65:103247. doi: 10.1016/j.ebiom.2021.103247 (PMC7920834; doi:10.1016/j.ebiom.2021.103247), 2021-02-26
Supplement: mmc1.pdf [file mmc1.pdf]

## Supplementary material

**Supplementary table 1a. *B. Pertussis* vaccine schedules and vaccines in Finland**

| Year       | Scheme                   | Vaccine composition                 | Change                                                                                                          | pertussis Vaccine name (Company)                                | Study cohort                                            | Vaccination coverage <sup>1</sup> |
|------------|--------------------------|-------------------------------------|-----------------------------------------------------------------------------------------------------------------|-----------------------------------------------------------------|---------------------------------------------------------|-----------------------------------|
| BEFORE     |                          |                                     |                                                                                                                 | No vaccine available                                            | Older adults                                            |                                   |
| 1952       |                          | DTwP                                | First only DwP, T added in 1957<br>1962 change to DTwP (Fim2,3 strain),<br>Additional Fim2 strain added in 1976 | Diphtheria-Pertussis Forte (Orion)<br>PDT (Orion)<br>DTwP (KTL) | Older and young adults                                  | 92-99%                            |
| 2003       | 3,4,5, 20-24 m<br>6y     | DTwP + IPV + Hib<br>Tdap3           | First ap booster vaccine in NIP                                                                                 | DTwP (KTL)<br>Boostrix (GSK)                                    | Adolescents<br>Adults                                   | 98%                               |
| 2005       | 3,5,12 m<br>4y           | DTaP2-IPV-Hib<br>DTaP2-IPV<br>Tdap3 | Introduction aP priming, 2 Bp components                                                                        | Pentavac (Sanofi)<br>Tetravac (Sanofi)<br>Boostrix (GSK)        | Adolescents and children                                | 97-99%                            |
| 2009       | 3,5,12 m<br>4y<br>14-15y | DTaP3-IPV-Hib<br>DTaP2-IPV<br>Tdap3 | Also catch-up for 11-13y<br>3 Bp components                                                                     | Infanrix (GSK)<br>Tetravac (Sanofi)<br>Boostrix                 | Young adults<br>Children<br>Adolescents<br>Young adults | 99%                               |
| 2012       | Military                 | Tdap3                               | Addition of pertussis vaccination in the<br>military, 18-25y (estimation)                                       | Boostrix (GSK)                                                  | Young adults                                            | 89-99%                            |
| 2018       | 25y                      | Tdap3                               | Introduction of adult booster                                                                                   | Boostrix (GSK)                                                  | Young adults                                            | 91%                               |
| 2019 (Sep) | 3,5,12 m                 | DTaP2-IPV-Hib                       | 2 Bp components                                                                                                 | Pentavac (Sanofi)                                               |                                                         |                                   |

**Supplementary table 1b. *B. Pertussis* vaccine schedules and vaccines in the Netherlands**

| Year       | Scheme                                           | Vaccine composition                    | Change                                                                         | pertussis Vaccine name (Company)         | Study cohort              | Vaccination coverage <sup>1</sup> |
|------------|--------------------------------------------------|----------------------------------------|--------------------------------------------------------------------------------|------------------------------------------|---------------------------|-----------------------------------|
| BEFORE     |                                                  |                                        |                                                                                | No vaccine available                     | Older adults              |                                   |
| 1954       |                                                  | DTwP                                   | Combination vaccine became available                                           | DTwP (RIVM)                              | Older adults              |                                   |
| 1957       | 3,4,5,11 m                                       | DTwP                                   | Start of NIP                                                                   | DTwP (RIVM)                              | Older and young<br>adults | 96-97%                            |
| 1999       | 2,3,4,11 m                                       | DTwP-IPV + Hib                         | Accelerated vaccination                                                        | DTwP(RIVM)                               |                           | 97.0-97.2%                        |
| 2001       | 2,3,4,11 m<br>4y                                 | DTwP-IPV + Hib<br>DT-IPV + aP3         | Introduction aP booster, 3 Bp components                                       | DTwP(RIVM)<br>monovalent aP (GSK)        | Adolescents               | 97.2-97.8%                        |
| 2005       | 2,3,4,11 m<br>4y                                 | DTaP3-IPV-Hib<br>DT-IPV + aP3          | Introduction aP priming, 3 Bp components                                       | Infanrix(GSK)<br>monovalent aP (GSK)     | Adolescents               | 96.0%                             |
| 2006 (Jan) | 2,3,4,11 m<br>4y                                 | DTaP5-IPV-Hib<br>DT-IPV + aP3          | 5 Bp components                                                                | Pediacel (SP MSD)<br>monovalent aP (GSK) | Adolescents               | 96.3-96.9%                        |
| 2011 (Oct) | 2,3,4,11 m<br>4y                                 | DTaP3-IPV-Hib-HepB + Pneu<br>DTaP3-IPV | 3 Bp components                                                                | Infanrix(GSK)<br>Infanrix(GSK)           |                           | 94.8-96.7%                        |
| 2017 (Jan) | 2,3,4,11 m<br>4y                                 | DTaP3-IPV-Hib-HepB + Pneu<br>Tdap3-IPV | Reduced dose of 3 Bp components                                                | Infanrix(GSK)<br>Boostrix(GSK)           |                           | 93.9%                             |
| 2018 (Dec) | 2,3,4,11 m<br>4y                                 | DTaP5-IPV-Hib-HepB + Pneu<br>Tdap3-IPV | 5 Bp components                                                                | Vaxelis (SP MSD)<br>Boostrix(GSK)        |                           | 93.5%                             |
| 2019 (Dec) | Pregnant women (from<br>22 w of gestational age) | Tdap3                                  | Introduction ap booster for pregnant women,<br>reduced dose of 3 Bp components | Boostrix (GSK)                           |                           |                                   |

**Supplementary table 1c. *B. Pertussis* vaccine schedules and vaccines in the UK**

| Year       | Scheme                                            | Vaccine composition                  | Change                                                                       | pertussis Vaccine name (Company)   | Study cohort             | Vaccination coverage <sup>1</sup> |
|------------|---------------------------------------------------|--------------------------------------|------------------------------------------------------------------------------|------------------------------------|--------------------------|-----------------------------------|
| BEFORE     |                                                   |                                      |                                                                              | No vaccine available               | Older adults             |                                   |
| 1957       | 3, 4.5-5, 8.5-11 m                                | <b>DTwP</b>                          | Start of NIP                                                                 | DTwP                               | Older adults             | 40.0-78.0%                        |
| 1990 (Jun) | 2,3,4 m                                           | <b>DTwP-IPV + Hib</b>                | Accelerated schedule                                                         | DTwP-IPV-Hib                       | Young adults             | 85.0-96.0%                        |
| 2000-2001  | 2,3,4 m                                           | <b>DTwP-IPV + Hib / DT-IPV + aP3</b> | Shortness of wP -use of a mix aP/wP                                          | DTwP-IPV-Hib                       |                          | 91.0%                             |
| 2001 (Nov) | 2,3,4 m                                           | <b>DTwP-IPV-Hib</b>                  |                                                                              | DTwP-IPV/Hib                       |                          | 91.0%                             |
|            | 3y 4m                                             | <b>DT-IPV + aP3</b>                  | Introduction aP booster                                                      |                                    |                          |                                   |
| 2004 (Aug) | 2,3,4 m                                           | <b>DTaP5-IPV-Hib</b>                 | Introduction aP priming, 5 Bp components                                     | Pediacel (SP MSD)                  | Adolescents              | 92%                               |
|            | 3y 4m                                             | <b>DT-IPV + aP5</b>                  |                                                                              | Repevax (MSD)                      |                          |                                   |
| 2005 (Jan) | 2,3,4 m                                           | <b>DTaP5-IPV-Hib / DTaP3-IPV-Hib</b> | Availability of 3 or 5 components                                            | Pediacel (SP MSD) / Infanrix (GSK) | Adolescents and children | 91.0-95.0%                        |
|            | 3y 4m                                             | <b>DT-IPV + aP5 / DT-IPV + aP3</b>   |                                                                              | Repevax (MSD) / Infanrix (GSK)     |                          |                                   |
| 2012 (Sep) | Pregnant woman (28-32w of gestational age)        | <b>DT-IPV + aP5</b>                  | Introduction ap booster for pregnant women , reduced dose of 5 Bp components | Repevax (MSD)                      |                          | 94.0-95.0%                        |
| 2016       | Pregnant woman (from 16 weeks of gestational age) | <b>DT-IPV + aP5 / DT-IPV + aP3</b>   | changed timing of vaccination, availability of 3 or 5 reduced Bp components  | Repevax (MSD) / Boostrix (GSK)     |                          |                                   |
| 2019 (Dec) | Pregnant women (from 22 weeks gestational age)    | <b>Tdap3</b>                         | changed timing of vaccination, discontinuation of use of Repevax             | Boostrix (GSK)                     |                          |                                   |

m=months; y= years; D=diphtheria; T=tetanus; wP: whole cell pertussis; aP: acellular pertussis; IPV: inactivated poliovirus; Pneu: pneumococcal; Hib: *Haemophilus influenzae* type B; HepB: Hepatitis B; Bp: *Bordetella pertussis*; NVI: Netherlands Vaccine Institute; GSK: GlaxoSmithKline; SP: Sanofi Pasteur; MSD: Merck Sharp & Dohme

**Supplementary table 2. IgG GMCs per age and country**

| Antigen                        | timepoint | Country | Children                                   | Adolescents                               | Young adults                     | Older adults                               |
|--------------------------------|-----------|---------|--------------------------------------------|-------------------------------------------|----------------------------------|--------------------------------------------|
| Ptx<br>GMC (CI)<br>in IU/ml    | Day 0     | FI      | 16 (11-23) <sup>a,b,c,d</sup>              | 13 (9-18) <sup>e,f</sup>                  | 5 (3-8) <sup>g,h,i</sup>         | 10 (7-16) <sup>j,k,l</sup>                 |
|                                |           | NL      | 12 (8-17) <sup>m,n,o</sup>                 | 14 (10-19) <sup>m,p,q</sup>               | 3 (2-5) <sup>r,s,t,u,v</sup>     | 15 (10-24) <sup>j,m,w,x</sup>              |
|                                |           | UK      | 8 (5-11) <sup>g,y,z,aa,bb</sup>            | 16 (11-23) <sup>b,j,z,cc,dd</sup>         | 3 (2-5) <sup>b,y,ee,ff</sup>     | 5 (3-7) <sup>l,y,gg,hh,ii</sup>            |
|                                | Day 28    | FI      | 197 (138-282) <sup>d,g,h</sup>             | 202 (141-288) <sup>f,h,ij</sup>           | 99 (64-153) <sup>a,c,e,i</sup>   | 132 (85-204) <sup>l,gg</sup>               |
|                                |           | NL      | 147 (103-211) <sup>o,r</sup>               | 150 (109-205) <sup>q,s</sup>              | 99 (64-152) <sup>m,v</sup>       | 156 (101-240) <sup>l,x</sup>               |
|                                |           | UK      | 110 (77-157) <sup>b,bb</sup>               | 137 (96-196) <sup>y,dd</sup>              | 112 (72-174) <sup>z,ff</sup>     | 86 (56-133) <sup>j,ii</sup>                |
|                                | 1 year    | FI      | 39 (27-55) <sup>c,g</sup>                  | 54 (38-77) <sup>e,i,ij</sup>              | 27 (17-42) <sup>a,f,h</sup>      | 51 (33-78) <sup>k,gg</sup>                 |
|                                |           | NL      | 30 (21-43) <sup>n,r</sup>                  | 44 (32-60) <sup>p,s,v</sup>               | 22 (14-34) <sup>m,q,u</sup>      | 43 (28-66) <sup>l,w</sup>                  |
|                                |           | UK      | 36 (25-51) <sup>b,aa</sup>                 | 48 (34-70) <sup>y,cc</sup>                | 30 (19-47) <sup>z,ee</sup>       | 38 (25-59) <sup>j,hh</sup>                 |
| FHA<br>GMC (CI)<br>in IU/ml    | Day 0     | FI      | 41 (31-54) <sup>b,c,d,r</sup>              | 47 (36-62) <sup>e,f,s,y,gg</sup>          | 30 (21-41) <sup>h,i,z</sup>      | 27 (20-38) <sup>k,l,r,ij</sup>             |
|                                |           | NL      | 25 (19-33) <sup>n,o,g,t</sup>              | 30 (24-38) <sup>m,p,q,r,ij</sup>          | 18 (13-25) <sup>s,t,u,v</sup>    | 59 (42-81) <sup>j,m,r,s,w,x,gg</sup>       |
|                                |           | UK      | 20 (15-26) <sup>g,aa,bb</sup>              | 29 (22-38) <sup>z,cc,dd,ij</sup>          | 15 (11-21) <sup>a,y,ee,ff</sup>  | 18 (13-25) <sup>t,hh,ii</sup>              |
|                                | Day 28    | FI      | 363 (277-476) <sup>d,g</sup>               | 369 (282-484) <sup>f,k,ij</sup>           | 281 (202-390) <sup>a,i</sup>     | 225 (162-312) <sup>e,l,w,gg</sup>          |
|                                |           | NL      | 234 (178-308) <sup>o,r,w</sup>             | 291 (230-369) <sup>q,s</sup>              | 330 (237-458) <sup>m,v</sup>     | 425 (306-590) <sup>k,n,t,x,hh</sup>        |
|                                |           | UK      | 288 (218-380) <sup>b,bb,hh</sup>           | 285 (216-375) <sup>y,dd,hh</sup>          | 287 (205-401) <sup>z,ff</sup>    | 174 (125-241) <sup>j,w,aa,cc,ii</sup>      |
|                                | 1 year    | FI      | 102 (78-135) <sup>c,g</sup>                | 139 (106-182) <sup>e,ij</sup>             | 117 (84-162) <sup>a,h</sup>      | 104 (75-144) <sup>k,gg</sup>               |
|                                |           | NL      | 60 (45-79) <sup>n,r</sup>                  | 107 (85-136) <sup>p,s</sup>               | 103 (74-143) <sup>m,u</sup>      | 140 (101-194) <sup>l,w</sup>               |
|                                |           | UK      | 113 (87-148) <sup>b,aa</sup>               | 119 (89-157) <sup>y,cc</sup>              | 119 (84-169) <sup>z,ee</sup>     | 88 (63-123) <sup>j,hh</sup>                |
| Prn<br>GMC (CI)<br>in IU/ml    | Day 0     | FI      | 9 (6-15) <sup>c,d,r</sup>                  | 7 (4-10) <sup>a,e,f,s,y</sup>             | 22 (12-39) <sup>h,i,m,ij</sup>   | 11 (6-19) <sup>k,l</sup>                   |
|                                |           | NL      | 24 (15-39) <sup>g,m,n,o,t</sup>            | 20 (13-30) <sup>m,t,p,q,ij</sup>          | 8 (5-15) <sup>a,r,s,u,v</sup>    | 8 (5-15) <sup>y,s,w,x</sup>                |
|                                |           | UK      | 20 (13-32) <sup>j,aa,bb</sup>              | 15 (9-24) <sup>cc,dd,ij</sup>             | 12 (7-23) <sup>ee,ff</sup>       | 6 (3-11) <sup>b,hh,ii</sup>                |
|                                | Day 28    | FI      | 391 (244-629) <sup>d,g</sup>               | 256 (159-411) <sup>f,ij</sup>             | 413 (232-735) <sup>a,i</sup>     | 195 (109-347) <sup>l,gg</sup>              |
|                                |           | NL      | 259 (160-419) <sup>o,r</sup>               | 467 (308-708) <sup>q,s</sup>              | 237 (133-421) <sup>m,v</sup>     | 232 (130-412) <sup>l,x</sup>               |
|                                |           | UK      | 248 (154-397) <sup>b,bb</sup>              | 270 (169-431) <sup>y,dd</sup>             | 371 (206-668) <sup>z,ff,hh</sup> | 111 (63-198) <sup>j,ee,ii</sup>            |
|                                | 1 year    | FI      | 95 (59-152) <sup>c,g</sup>                 | 85 (53-137) <sup>e,k,ij</sup>             | 193 (108-343) <sup>a,h</sup>     | 90 (50-159) <sup>k,gg</sup>                |
|                                |           | NL      | 71 (44-116) <sup>n,q,r</sup>               | 170 (112-258) <sup>o,p,s</sup>            | 107 (60-190) <sup>m,u</sup>      | 81 (46-145) <sup>l,w</sup>                 |
|                                |           | UK      | 89 (57-141) <sup>b,aa</sup>                | 103 (64-166) <sup>y,cc</sup>              | 168 (92-308) <sup>z,ee</sup>     | 65 (37-117) <sup>j,hh</sup>                |
| Fim2/3<br>GMC (CI)<br>in AU/ml | Day 0     | FI      | 0.2 (0.1-0.3) <sup>a,b,c,d,r,ij,gg</sup>   | 0.7 (0.4-1.3) <sup>a,e,f,g,s,y,gg</sup>   | 7.4 (3.7-14.7) <sup>g,ij</sup>   | 10.1 (5.1-20.2) <sup>g,j,ij</sup>          |
|                                |           | NL      | 5.4 (3.0-9.5) <sup>g,n</sup>               | 4.3 (2.6-7.1) <sup>y,ij</sup>             | 6.6 (3.3-13.2)                   | 4.0 (2.0-7.9)                              |
|                                |           | UK      | 10.3 (6.1-17.5) <sup>g,i,aa</sup>          | 11.1 (6.5-18.8) <sup>j,s,ij</sup>         | 10.6 (5.2-21.4) <sup>j</sup>     | 1.5 (0.8-3.1) <sup>b,y,z,gg</sup>          |
|                                | Day 28    | FI      | 0.3 (0.2-0.6) <sup>c,e,g,h,k,n,aa</sup>    | 1.1 (0.6-1.9) <sup>c,h,k,p,cc,ij</sup>    | 8.8 (4.4-17.5) <sup>e,f,i</sup>  | 10.1 (5.1-20.1) <sup>c,e,f,j,h</sup>       |
|                                |           | NL      | 7.6 (4.3-13.5) <sup>o,r</sup>              | 5.2 (3.2-8.6) <sup>e,q,cc</sup>           | 7.7 (3.9-15.4) <sup>y</sup>      | 4.3 (2.2-8.6) <sup>x</sup>                 |
|                                |           | UK      | 17 (10.0-28.9) <sup>b,c,bb,hh</sup>        | 14.9 (8.8-25.3) <sup>e,p,dd,hh</sup>      | 10.7 (5.3-21.7) <sup>hh</sup>    | 1.7 (0.8-3.3) <sup>k,aa,cc,ee</sup>        |
|                                | 1 year    | FI      | 0.3 (0.2-0.6) <sup>d,f,g,i,l,o,bb,ii</sup> | 1.1 (0.6-1.9) <sup>d,q,i,l,dd,ii,ij</sup> | 5.7 (2.9-11.4) <sup>d,h,ii</sup> | 11.6 (5.8-23.0) <sup>d,x,bb,dd,ff,ii</sup> |
|                                |           | NL      | 4.7 (2.6-8.3) <sup>n,bb</sup>              | 3.5 (2.1-5.7) <sup>p,dd</sup>             | 5.0 (2.5-10.0) <sup>a</sup>      | 2.9 (1.5-5.8) <sup>l,w</sup>               |
|                                |           | UK      | 11.8 (7.0-19.7) <sup>d,o,aa</sup>          | 10.5 (6.1-18.0) <sup>f,q,cc</sup>         | 8.8 (4.3-17.9)                   | 1.9 (0.9-3.7) <sup>l</sup>                 |

Ptx: pertussis toxin; FHA: filamentous haemagglutinin; Prn: pertactin; Fim2/3: fimbriae 2 and 3; GMC: geometric mean concentration; CI: confidence interval; IU/ml: international units per millilitre; AU/ml: arbitrary units per millilitre; FI: Finland; NL: Netherlands; UK: United Kingdom. Significance per antigen has been tested between timepoints of an age group, age groups within a country and between countries within an age group,  $p \leq 0.05$ ,  $p \leq 0.01$ ,  $p \leq 0.001$ . Significantly different from **a** young adults FI at day 0; **b** children UK at day 0; **c** children FI at day 28; **d** children FI at 1 year; **e** adolescents FI at day 28; **f** adolescents FI at 1 year; **g** children FI at day 0; **h** young adults FI at day 28; **i** young adults FI at 1 year; **j** older adults UK at day 0; **k** older adults FI at day 28; **l** older adults FI at 1 year; **m** young adults NL at day 0; **n** children NL at day 28; **o** children NL at 1 year; **p** adolescents NL at day 28; **q** adolescents NL at 1 year; **r** children NL at day 0; **s** adolescents NL at day 0; **t** older adults NL at day 0; **u** young adults NL at day 28; **v** young adults NL at 1 year; **w** older adults NL at day 28; **x** older adults NL at 1 year; **y** adolescents UK at day 0; **z** young adults UK at day 0; **aa** children UK at day 28; **bb** children UK at 1 year; **cc** adolescents UK at day 28; **dd** adolescents UK at 1 year; **ee** young adults UK at day 28; **ff** young adults UK at 1 year; **gg** older adults FI at day 0; **hh** older adults UK at day 28; **ii** older adults UK at 1 year; **jj** adolescents FI at day 0.

**Supplementary table 3. IgA GMCs per age and country**

| Antigen                        | timepoint | Country | Children                                    | Adolescents                              | Young adults                           | Older adults                              |
|--------------------------------|-----------|---------|---------------------------------------------|------------------------------------------|----------------------------------------|-------------------------------------------|
| Ptx<br>GMC (CI)<br>in IU/ml    | Day 0     | FI      | 0.26 (0.18-0.38) <sup>a,b,c</sup>           | 0.39 (0.26-0.57) <sup>a,d,e</sup>        | 0.49 (0.30-0.77) <sup>f,g</sup>        | 0.86 (0.54-1.37) <sup>h,i,j,k,l</sup>     |
|                                |           | NL      | 0.38 (0.26-0.56) <sup>j,m,n,o,p</sup>       | 0.68 (0.49-0.95) <sup>q,r,s,t</sup>      | 0.77 (0.48-1.23) <sup>u,v</sup>        | 1.88 (1.18-2.99) <sup>a,m,n,q,w,x,y</sup> |
|                                |           | UK      | 0.23 (0.16-0.34) <sup>w,z,aa,bb</sup>       | 0.36 (0.25-0.53) <sup>m,cc,dd</sup>      | 0.57 (0.35-0.91) <sup>ee,ff,gg</sup>   | 0.63 (0.39-1.00) <sup>ee,hh,ii</sup>      |
|                                | Day 28    | FI      | 0.82 (0.56-1.20) <sup>d,f,h,k</sup>         | 1.66 (1.14-2.44) <sup>b,i,k</sup>        | 2.07 (1.30-3.29) <sup>b,k,ji</sup>     | 8.2 (5.2-13.1) <sup>a,b,d,fl</sup>        |
|                                |           | NL      | 1.32 (0.89-1.94) <sup>p,q,u,x</sup>         | 2.15 (1.53-3.00) <sup>m,tx</sup>         | 3.63 (2.28-5.78) <sup>n,o,v,x</sup>    | 19.5 (12.3-31.1) <sup>j,o,s,u,y</sup>     |
|                                |           | UK      | 1.06 (0.72-1.56) <sup>cc,ee,ff,hh</sup>     | 2.01 (1.37-2.94) <sup>faa,dd,hh</sup>    | 2.33 (1.46-3.73) <sup>zaa,hh</sup>     | 11.2 (7.0-17.9) <sup>w,aa,cc,ff,ii</sup>  |
|                                | 1 year    | FI      | 0.79 (0.54-1.16) <sup>g,h,l</sup>           | 1.45 (0.99-2.12) <sup>h,l</sup>          | 1.73 (1.09-2.75) <sup>c,d,ij</sup>     | 4.78 (3.00-7.61) <sup>a,c,e,g,k</sup>     |
|                                |           | NL      | 0.71 (0.48-1.05) <sup>o,q,v,y</sup>         | 1.11 (0.79-1.55) <sup>m,s,y</sup>        | 1.84 (1.15-2.92) <sup>n,p,u,y</sup>    | 7.1 (4.5-11.3) <sup>j,p,t,v,x</sup>       |
|                                |           | UK      | 0.85 (0.59-1.23) <sup>ee,ii</sup>           | 1.36 (0.92-2.01) <sup>r,cc,ii</sup>      | 1.58 (0.97-2.56) <sup>z,ii</sup>       | 4.71 (2.95-7.53) <sup>w,bb,dd,gg,hh</sup> |
| FHA<br>GMC (CI)<br>in IU/ml    | Day 0     | FI      | 0.14 (0.07-0.30) <sup>a,b</sup>             | 0.22 (0.10-0.45) <sup>a,d,m</sup>        | 0.32 (0.13-0.80) <sup>a,f,g</sup>      | 1.76 (0.71-4.35) <sup>h,i,j,k,l,ij</sup>  |
|                                |           | NL      | 0.11 (0.05-0.23) <sup>j,m,n,o</sup>         | 0.74 (0.38-1.41) <sup>i,j,q,s,t</sup>    | 0.46 (0.19-1.14) <sup>j,q,u,v</sup>    | 10.5 (4.2-25.9) <sup>a,m,n,q,w,x,y</sup>  |
|                                |           | UK      | 0.12 (0.06-0.26) <sup>r,w,z,aa,bb</sup>     | 0.58 (0.28-1.23) <sup>cc,dd,ee</sup>     | 0.47 (0.19-1.19) <sup>ee,ff,gg</sup>   | 1.96 (0.79-4.84) <sup>ee,hh,ii</sup>      |
|                                | Day 28    | FI      | 1.65 (0.78-3.48) <sup>f,h,k,c</sup>         | 2.56 (1.22-5.39) <sup>e,i,k,s</sup>      | 8.9 (3.6-22.03) <sup>b,g,t,ij</sup>    | 84 (34-209) <sup>a,b,d,fl</sup>           |
|                                |           | NL      | 1.79 (0.84-3.80) <sup>p,q,u,x</sup>         | 10.1 (5.2-19.3) <sup>d,m,o,t,x</sup>     | 14.9 (6.0-37.0) <sup>n,o,v,x</sup>     | 148 (59-366) <sup>j,o,s,u,y,hh</sup>      |
|                                |           | UK      | 3.47 (1.64-7.38) <sup>bb,ee,hh</sup>        | 6.4 (3.0-13.6) <sup>r,dd,hh</sup>        | 9.7 (3.9-24.3) <sup>z,gg,hh</sup>      | 76 (31-188) <sup>w,x,aa,cc,ff,ii</sup>    |
|                                | 1 year    | FI      | 0.25 (0.12-0.52) <sup>b,g,l</sup>           | 0.40 (0.19-0.83) <sup>d,g,l,t,ddd</sup>  | 1.69 (0.68-4.20) <sup>c,e,fl,ij</sup>  | 29.8 (12.0-73.7) <sup>a,c,e,g,k</sup>     |
|                                |           | NL      | 0.18 (0.09-0.39) <sup>o,dd,gg,ii</sup>      | 2.75 (1.43-5.30) <sup>e,m,s,y,bb</sup>   | 3.23 (1.30-7.99) <sup>n,u,y,bb</sup>   | 42 (17-105) <sup>i,t,v,bb</sup>           |
|                                |           | UK      | 0.35 (0.17-0.74) <sup>aa,dd,ee,gg,ii</sup>  | 1.98 (0.92-4.26) <sup>e,r,bb,cc,ii</sup> | 2.68 (1.04-6.92) <sup>z,bb,ff,ii</sup> | 18.5 (7.4-46.3) <sup>w,bb,dd,gg,hh</sup>  |
| Prn<br>GMC (CI)<br>in IU/ml    | Day 0     | FI      | 1.25 (0.71-2.18) <sup>a,b,c,ji</sup>        | 1.67 (0.95-2.92) <sup>a,d,e,ji</sup>     | 4.50 (2.27-8.90) <sup>f,g,h,i</sup>    | 6.2 (3.1-12.3) <sup>h,i,k,l</sup>         |
|                                |           | NL      | 1.45 (0.82-2.56) <sup>j,m,n,o,p</sup>       | 3.55 (2.17-5.80) <sup>q,r,s,t</sup>      | 4.24 (2.14-8.39) <sup>u,v</sup>        | 8.4 (4.2-16.6) <sup>q,x,y</sup>           |
|                                |           | UK      | 0.85 (0.49-1.48) <sup>w,z,aa,bb</sup>       | 0.95 (0.54-1.64) <sup>m,w,z,cc,dd</sup>  | 3.71 (1.87-7.39) <sup>r,ee,ff,gg</sup> | 4.55 (2.3-8.99) <sup>r,ee,hh,ii</sup>     |
|                                | Day 28    | FI      | 7.0 (4.0-12.3) <sup>f,h,k</sup>             | 9.2 (5.3-16.2) <sup>fi,k</sup>           | 55 (28-108) <sup>b,d,g,ji</sup>        | 97 (49-192) <sup>a,b,d,l</sup>            |
|                                |           | NL      | 3.49 (1.98-6.15) <sup>q,s,u,x</sup>         | 15.3 (9.3-25.0) <sup>m,o,t,u,x,cc</sup>  | 46.7 (23.6-92.3) <sup>n,o,s,v,x</sup>  | 230 (116-455) <sup>j,o,s,u,y</sup>        |
|                                |           | UK      | 4.03 (2.31-7.03) <sup>ee,ff,hh</sup>        | 4.78 (2.75-8.31) <sup>r,s,ff,hh</sup>    | 37.1 (18.7-73.9) <sup>z,aa,cc,gg</sup> | 103 (52-203) <sup>w,aa,cc,ii</sup>        |
|                                | 1 year    | FI      | 6.6 (3.8-11.6) <sup>g,h,l</sup>             | 7.4 (4.2-13.0) <sup>g,h,l</sup>          | 28.9 (14.6-57.2) <sup>c,e,f,ij</sup>   | 45.8 (23.2-90.6) <sup>a,c,e,k</sup>       |
|                                |           | NL      | 3.38 (1.92-5.97) <sup>q,t,v,y</sup>         | 9.1 (5.6-15.0) <sup>m,p,s,y</sup>        | 17.0 (8.6-33.7) <sup>u,n,p,y</sup>     | 89 (45-177) <sup>j,p,t,v,x</sup>          |
|                                |           | UK      | 3.58 (2.09-6.14) <sup>ee,gg,ii</sup>        | 4.67 (2.65-8.22) <sup>r,gg,ii</sup>      | 18.5 (9.2-37.6) <sup>z,bb,dd,ff</sup>  | 45.8 (23.0-91.0) <sup>w,bb,dd,hh</sup>    |
| Fim2/3<br>GMC (CI)<br>in AU/ml | Day 0     | FI      | 0.14 (0.08-0.27) <sup>a,b,c,q,i,ee,ii</sup> | 0.45 (0.24-0.86) <sup>a,e,m,h,r,ji</sup> | 4.8 (2.2-10.3) <sup>h,i</sup>          | 11.8 (5.4-25.6) <sup>h,i,l</sup>          |
|                                |           | NL      | 2.61 (1.37-4.96) <sup>h,j</sup>             | 4.41 (2.52-7.70) <sup>h,j</sup>          | 8.2 (3.8-17.8)                         | 25.7 (11.8-55.6) <sup>q,m,w</sup>         |
|                                |           | UK      | 3.09 (1.69-5.66) <sup>haa</sup>             | 5.7 (3.1-10.4) <sup>j</sup>              | 9.9 (4.6-21.6)                         | 3.44 (1.59-7.46) <sup>y</sup>             |
|                                | Day 28    | FI      | 0.28 (0.15-0.53) <sup>c,f,h,k,o,aa</sup>    | 0.66 (0.35-1.25) <sup>e,f,k,s,cc</sup>   | 6.1 (2.8-13.2) <sup>b,d</sup>          | 18.6 (8.6-40.3) <sup>b,d</sup>            |
|                                |           | NL      | 3.50 (1.84-6.67) <sup>b,x</sup>             | 4.11 (2.35-7.18) <sup>d,x</sup>          | 9.2 (4.2-19.8)                         | 24.5 (11.3-53.1) <sup>a,s,hh</sup>        |
|                                |           | UK      | 5.8 (3.2-10.8) <sup>b,ee</sup>              | 7.9 (4.3-14.5) <sup>d</sup>              | 11.5 (5.3-25.1)                        | 5.0 (2.3-10.8) <sup>x</sup>               |
|                                | 1 year    | FI      | 0.56 (0.30-1.06) <sup>b,e,g,h,l,p,bb</sup>  | 1.96 (1.04-3.71) <sup>c,d,i,l,dd</sup>   | 6.3 (2.9-13.6) <sup>c,l</sup>          | 24.8 (11.4-53.7) <sup>a,c,e,g,ii</sup>    |
|                                |           | NL      | 3.14 (1.65-5.98) <sup>c,y</sup>             | 3.87 (2.22-6.77) <sup>y</sup>            | 8.0 (3.7-17.4)                         | 23.1 (10.4-50.0) <sup>p,r,ii</sup>        |
|                                |           | UK      | 4.51 (2.49-8.14) <sup>c</sup>               | 6.5 (3.5-12.1) <sup>e</sup>              | 10.9 (5.0-24.1)                        | 5.0 (2.3-10.9) <sup>j,y</sup>             |

Ptx: pertussis toxin; FHA: filamentous haemagglutinin; Prn: pertactin; Fim2/3: fimbriae 2 and 3; GMC: geometric mean concentration; CI: confidence interval; IU/ml: international units per millilitre; AU/ml: arbitrary units per millilitre; FI: Finland; NL: Netherlands; UK: United Kingdom. Significance per antigen has been tested between timepoints of an age group, age groups within a country and between countries within an age group,  $p \leq 0.05$ ,  $p \leq 0.01$ ,  $p \leq 0.001$ . Significantly different from **a** older adults, FI at day 0; **b** children, FI at day 28; **c** children, FI at 1 year; **d** adolescents, FI at day 28; **e** adolescents, FI at 1 year; **f** young adults, FI at day 28; **g** young adults, FI at 1 year; **h** children, FI at day 0; **i** adolescents, FI at day 0; **j** older adults, NL at day 0; **k** older adults, FI at day 28; **l** older adults, FI at 1 year; **m** adolescents, NL at day 0; **n** young adults, NL at day 0; **o** children, NL at day 28; **p** children, NL at 1 year; **q** children, NL at day 0; **r** adolescents, UK at day 0; **s** adolescents, NL at day 28; **t** adolescents, NL at 1 year; **u** young adults, NL at day 28; **v** young adults, NL at 1 year; **w** older adults, UK at day 0; **x** older adults, NL at day 28; **y** older adults, NL at 1 year; **z** young adults, UK at day 0; **aa** children, UK at day 28; **bb** children, UK at 1 year; **cc** adolescents, UK at day 28; **dd** adolescents, UK at 1 year; **ee** children, UK at day 0; **ff** young adults, UK at day 28; **gg** young adults, UK at 1 year; **hh** older adults, UK at day 28; **ii** older adults, UK at 1 year; **jj** young adults, FI at day 0.

**Supplementary table 4. GMCs of pertactin per vaccination background**

| Ig class                    | Timepoint | aP2 (n=10)                       | aP3 (n=7)                        | wP (n=41)                        |
|-----------------------------|-----------|----------------------------------|----------------------------------|----------------------------------|
| IgG<br>GMC (CI)<br>in IU/ml | Day 0     | 0.9 (0.4-2.2) <sup>a,b,c,d</sup> | 24.7 (9.0-67.7) <sup>e,f,g</sup> | 14.9 (9.8-22.6) <sup>e,h,i</sup> |
|                             | Day 28    | 62 (26-143) <sup>d,e,f,h</sup>   | 652 (238-1788) <sup>a,c</sup>    | 451 (297-683) <sup>b,c,i</sup>   |
|                             | 1 Year    | 11 (5-26) <sup>c,e,g,i</sup>     | 263 (96-720) <sup>a,d</sup>      | 175 (115-265) <sup>b,d,h</sup>   |
| IgA<br>GMC (CI)<br>in IU/ml | Day 0     | 0.6 (0.2-1.9) <sup>b,c,d</sup>   | 4.0 (1.0-16.3) <sup>f,g</sup>    | 3.2 (1.8-5.8) <sup>e,h,i</sup>   |
|                             | Day 28    | 5 (2-16) <sup>e</sup>            | 29 (7-119) <sup>a</sup>          | 17 (9-30) <sup>b,i</sup>         |
|                             | 1 Year    | 10 (3-33) <sup>e</sup>           | 18 (4-74) <sup>a</sup>           | 9 (5-16) <sup>b,h</sup>          |

aP2: participants prior to study exclusively vaccinated with 2 acellular pertussis components containing vaccines; aP3: participants prior to study exclusively vaccinated with 3 acellular pertussis components containing vaccines; wP: participants prior to study at least 3 times vaccinated with a whole cell pertussis containing vaccine; GMC: geometric mean concentration; CI: confidence interval; IU/ml: international units per millilitre. Significance per Ig class has been tested between timepoints within a vaccine group and between vaccine groups within a timepoint,  $p \leq 0.05$ ,  $p \leq 0.01$ ,  $p \leq 0.001$ . Significantly different from **a** aP3 at day 0; **b** wP at day 0; **c** aP2 at day 28; **d** aP2 at 1 year; **e** aP2 at day 0, **f** aP3 at day 28; **g** aP3 at 1 year; **h** wP at day 28, **i** wP at 1 year.

**Supplementary table 5. GMCs of Fim2/3 per vaccination background**

| Ig class                    | Timepoint | aP3 (n=7)                    | aP5 (n=65)                         | wP (n=41)                      |
|-----------------------------|-----------|------------------------------|------------------------------------|--------------------------------|
| IgG<br>GMC (CI)<br>in AU/ml | Day 0     | 0.2 (0.1-0.8) <sup>a,b</sup> | 7.4 (5.1-10.8) <sup>b,c,d,e</sup>  | 3.5 (2.2-5.7) <sup>a,c,f</sup> |
|                             | Day 28    | 0.4 (0.1-1.2) <sup>d,f</sup> | 10.1 (6.9-14.7) <sup>a,e,f,g</sup> | 4.6 (2.8-7.4) <sup>b,g,d</sup> |
|                             | 1 Year    | 0.3 (0.1-1.1) <sup>e,h</sup> | 6.0 (4.1-8.7) <sup>a,d,i</sup>     | 3.9 (2.4-6.3) <sup>i</sup>     |
| IgA<br>GMC (CI)<br>in AU/ml | Day 0     | 0.6 (0.1-2.5)                | 3.6 (2.2-5.9)                      | 2.7 (1.4-4.9)                  |
|                             | Day 28    | 1.0 (0.2-4.4)                | 4.7 (2.9-7.6)                      | 2.7 (1.5-5.1)                  |
|                             | 1 Year    | 0.9 (0.2-3.8)                | 4.2 (2.6-6.8)                      | 3.9 (2.1-7.1)                  |

aP3: participants prior to study exclusively vaccinated with 3 acellular pertussis components containing vaccines; aP5: participants prior to study at least 3 times vaccinated with 5 acellular pertussis components containing vaccines; wP: participants prior to study at least 3 times vaccinated with a whole cell pertussis containing vaccine; GMC: geometric mean concentration; CI: confidence interval; IU/ml: international units per millilitre. IgG and IgA GMCs and confidence intervals (CI). Significance per Ig class has been tested between timepoints within a vaccine group and between vaccine groups within a timepoint,  $p \leq 0.05$ ,  $p \leq 0.01$ ,  $p \leq 0.001$ . Significantly different from **a** aP5 at day 0; **b** wP at day 0; **c** aP3 at day 0; **d** aP5 at day 28; **e** aP5 at 1 year; **f** wP at day 28, **g** aP3 at day 28; **h** wP at 1 year, **i** aP3 at 1 year.

## Supplementary panel. List of in- and exclusion criteria

### Inclusion criteria

In order to be eligible to participate in this study, participants must meet all of the following criteria:

- normal general health;
- within the right age group for the cohort;
- received all regular vaccines for their age group according to the Dutch NIP in the Netherlands, UK NIP in the United Kingdom, or Finnish NIP in Finland; a copy of the vaccination booklet will be included in the participant's documents. If booklet is not available for cohorts A, B and C, vaccination status will be checked with regulatory agencies / GP. For cohort C and D this booklet might not be available due to their age;
- provision of written informed consent from the adult participants and parents or legal guardians of minors;
- willing to adhere to the protocol and be available during the study period.

### Exclusion criteria

- present evidence of serious disease(s) within the last 3 months before inclusion requiring immunosuppressive or immune modulating medical treatment, such as systemic corticosteroids, that might interfere with the results of the study ;
- chronic infection
- known or suspected immune deficiency;
- history of any neurologic disorder, including epilepsy;
- previous administration of serum products (including immunoglobulins) within 6 months before vaccination and blood sampling;
- known or suspected allergy to any of the vaccine components (by medical history);
- occurrence of serious adverse events (SAEs) after primary DTwP-IPV vaccination, DTaP-IPV vaccination or any other vaccination (by medical history);
- vaccination with any pertussis containing vaccine other than those described in the inclusion criteria (i.e. only according to NIP);
- adult pertussis vaccination according to the NIP in the last 5 years (i.e. maternal vaccination);
- children in cohort B in Finland who already received the Tdap booster at 14-15 years of age;
- vaccination with any other diphtheria, tetanus or polio containing vaccine in the last 5 years, other than described in the NIP;
- children between 8 and 10 years of age eligible for cohort A in the Netherlands who have already received the dT-IPV booster vaccination according to the Dutch NIP around 9 years of age;
- children in cohort B in the United Kingdom who already received the dT-IPV booster vaccination according to the UK NIP around 14 years of age;
- mixed wP and aP priming within a participant;
- pregnancy.

### References

1. OECD (2020). Child vaccination rates (indicator). doi: 10.1787/b23c7d13-en (accessed on 21 August 2020).
